# Supplementary material for: Australian Suicide Prevention using Health-Linked Data (ASHLi): Protocol for a population-based case series study
Source: PubMed Central journal article supplement — BMJ Open. 2020 May 11;10(5):e038181. doi: 10.1136/bmjopen-2020-038181 (PMC7223353; doi:10.1136/bmjopen-2020-038181), 2020-05-11
Supplement: bmjopen-2020-038181.draft_revisions.pdf [file bmjopen-2020-038181.draft_revisions.pdf]

# BMJ Open

BMJ Open is committed to open peer review. As part of this commitment we make the peer review history of every article we publish publicly available.

When an article is published we post the peer reviewers' comments and the authors' responses online. We also post the versions of the paper that were used during peer review. These are the versions that the peer review comments apply to.

The versions of the paper that follow are the versions that were submitted during the peer review process. They are not the versions of record or the final published versions. They should not be cited or distributed as the published version of this manuscript.

BMJ Open is an open access journal and the full, final, typeset and author-corrected version of record of the manuscript is available on our site with no access controls, subscription charges or pay-per-view fees (<http://bmjopen.bmj.com>).

If you have any questions on BMJ Open's open peer review process please email [info.bmjopen@bmj.com](mailto:info.bmjopen@bmj.com)

# BMJ Open

## Australian Suicide Prevention using Health-Linked Data (ASHLi): The study protocol

|                               |                                                                                                                                                                                                                                                                                                                                                                                                                                                                                                                                                                                                                                                                                                                                                                                                                                                                        |
|-------------------------------|------------------------------------------------------------------------------------------------------------------------------------------------------------------------------------------------------------------------------------------------------------------------------------------------------------------------------------------------------------------------------------------------------------------------------------------------------------------------------------------------------------------------------------------------------------------------------------------------------------------------------------------------------------------------------------------------------------------------------------------------------------------------------------------------------------------------------------------------------------------------|
| Journal:                      | <i>BMJ Open</i>                                                                                                                                                                                                                                                                                                                                                                                                                                                                                                                                                                                                                                                                                                                                                                                                                                                        |
| Manuscript ID                 | bmjopen-2020-038181                                                                                                                                                                                                                                                                                                                                                                                                                                                                                                                                                                                                                                                                                                                                                                                                                                                    |
| Article Type:                 | Protocol                                                                                                                                                                                                                                                                                                                                                                                                                                                                                                                                                                                                                                                                                                                                                                                                                                                               |
| Date Submitted by the Author: | 10-Mar-2020                                                                                                                                                                                                                                                                                                                                                                                                                                                                                                                                                                                                                                                                                                                                                                                                                                                            |
| Complete List of Authors:     | Chitty, Kate; The University of Sydney, Pharmacology<br>Schumann, Jennifer; Monash University, Victorian Institute of Forensic Medicine<br>Schaffer, Andrea; University of New South Wales, Centre for Big Data Research in Health<br>Cairns, Rose; The Children's Hospital at Westmead, NSW Poisons Information Centre; The University of Sydney, Sydney Pharmacy School<br>Gonzaga, Nicole; The University of Sydney, Pharmacology<br>Raubenheimer, Jacques; University of Sydney, Discipline of Pharmacology<br>Carter, Gregory; University of Newcastle, Australia, Calvary Mater Newcastle Hospital<br>Page, Andrew; Western Sydney University - Campbelltown Campus, Translational Health Research Institute<br>Pearson, Sallie-Anne; University of New South Wales, Medicines Policy Research Unit<br>Buckley, Nicholas; The University of Sydney, Pharmacology |
| Keywords:                     | Suicide & self-harm < PSYCHIATRY, HEALTH SERVICES ADMINISTRATION & MANAGEMENT, MENTAL HEALTH, EPIDEMIOLOGY                                                                                                                                                                                                                                                                                                                                                                                                                                                                                                                                                                                                                                                                                                                                                             |
|                               |                                                                                                                                                                                                                                                                                                                                                                                                                                                                                                                                                                                                                                                                                                                                                                                                                                                                        |

SCHOLARONE™  
Manuscripts

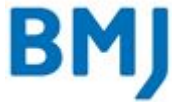

I, the Submitting Author has the right to grant and does grant on behalf of all authors of the Work (as defined in the below author licence), an exclusive licence and/or a non-exclusive licence for contributions from authors who are: i) UK Crown employees; ii) where BMJ has agreed a CC-BY licence shall apply, and/or iii) in accordance with the terms applicable for US Federal Government officers or employees acting as part of their official duties; on a worldwide, perpetual, irrevocable, royalty-free basis to BMJ Publishing Group Ltd ("BMJ") its licensees and where the relevant Journal is co-owned by BMJ to the co-owners of the Journal, to publish the Work in this journal and any other BMJ products and to exploit all rights, as set out in our [licence](#).

The Submitting Author accepts and understands that any supply made under these terms is made by BMJ to the Submitting Author unless you are acting as an employee on behalf of your employer or a postgraduate student of an affiliated institution which is paying any applicable article publishing charge ("APC") for Open Access articles. Where the Submitting Author wishes to make the Work available on an Open Access basis (and intends to pay the relevant APC), the terms of reuse of such Open Access shall be governed by a Creative Commons licence – details of these licences and which [Creative Commons](#) licence will apply to this Work are set out in our licence referred to above.

Other than as permitted in any relevant BMJ Author's Self Archiving Policies, I confirm this Work has not been accepted for publication elsewhere, is not being considered for publication elsewhere and does not duplicate material already published. I confirm all authors consent to publication of this Work and authorise the granting of this licence.

Australian Suicide Prevention using Health-Linked Data (ASHLi):

The study protocol

Chitty KM<sup>1</sup>, Schumann J<sup>2</sup>, Schaffer A<sup>3</sup>, Cairns R<sup>4</sup>, Gonzaga NJ<sup>1</sup>, Raubenheimer JE<sup>1</sup>, Carter G<sup>5</sup>,  
Page A<sup>6</sup>, Pearson SA<sup>3</sup>, Buckley NA<sup>1</sup>

- 1 University of Sydney, Faculty of Medicine and Health, Discipline of Pharmacology,  
Clinical Pharmacology and Toxicology Research Group, Sydney, Australia
- 2 Victorian Institute of Forensic Medicine, Department of Forensic Medicine, Monash  
University, Southbank, Victoria, Australia
- 3 Centre for Big Data Research in Health, UNSW Sydney, Australia
- 4 University of Sydney, School of Pharmacy
- 5 Calvary Mater Newcastle , Dept. Consultation-Liaison Psychiatry, Australia
- 6 Translational Health Research Institute, Western Sydney University, Australia

Corresponding author: Kate M Chitty

Discipline of Pharmacology, School of Medical Sciences, Medicine and Health University of  
Sydney, Sydney, Australia

Building K06, Level 3, Room 307A, 1 – 3 Ross St, The University of Sydney, NSW 2006

T: +61 2 9351 8709

E: [kate.chitty@sydney.edu.au](mailto:kate.chitty@sydney.edu.au)

## ABSTRACT

**Introduction:** In Australia suicide is the leading cause of death for people aged 15 - 44. Health professionals deliver most of our key suicide prevention strategies via health services, but other efficacious population-level strategies include means restriction and public awareness campaigns. Currently, we have no population-level data allowing us to determine which individuals, in what parts of Australia, are likely to utilise our most promising interventions delivered by health services. The aims of this study are to describe 1) health service utilisation rates in the year prior to death by suicide, and how this varies by individual case characteristics; 2) prescribed medicines use in the year prior to death by suicide, medicines used in suicide by poisoning and how this varies by individual case characteristics.

**Methods and analysis:** This is a population-based case series study of all suicide cases in Australia identified through the National Coronial Information System (NCIS) from 2013 - 2019. Cases will be linked to administrative claims data detailing health service use and medicines dispensed in the year before death. We will also obtain findings from the coronial enquiry, including toxicology. Descriptive statistics will be produced to characterise health service and prescribed medicine use and how utilisation varies by age, sex, method of death and socio-economic status. We will explore the geographical variability of health service and medicine use, highlighting regions in Australia associated with more limited access.

**Ethics and dissemination:** This project involves use of sensitive and confidential data. Data will be linked using a third-party privacy preserving protocol meaning that investigators will not have access to identifiable information once the data has been linked. Statistical analyses will be carried out in a secure environment. Findings will be published in peer-reviewed journals, presented at conferences and communicated to regulatory authorities, clinicians and policy makers.

1  
2  
3  
4  
5  
6  
7  
8 **Keywords:** Retrospective, Suicides, Medicines, Administrative data, Data linkage, mental  
9  
10 health, health service utilisation, epidemiology  
11  
12  
13  
14  
15  
16  
17  
18  
19  
20  
21  
22  
23  
24  
25  
26  
27  
28  
29  
30  
31  
32  
33  
34  
35  
36  
37  
38  
39  
40  
41  
42  
43  
44  
45  
46  
47  
48  
49  
50  
51  
52  
53  
54  
55  
56  
57  
58  
59  
60

For peer review only

### STRENGTHS AND LIMITATIONS OF THIS STUDY

- This is a population-based case series study of all suicide cases in Australia from 2013 – 2019.
- Coronial data will be linked to individual dispensing records for prescribed medicines, to create a comprehensive view of medicine access at time of death.
- By measuring geographical variability of health service use across the cohort, we will highlight regions in Australia with with reduced access to these important avenues for suicide prevention
- All cases in the study have died from suicide, therefore risk of suicide can not be established.

## INTRODUCTION

### *Background*

Suicide prevention is a worldwide public health priority (1). In Australia suicide is the leading cause of years of potential life lost, the leading cause of death for people aged between 15 and 44, and suicide rates have remained largely unchanged over the past decade (2).

The most effective suicide prevention strategies delivered by health services in Australia includes training general practitioners (GPs) to identify and support people in distress, similar training for other health personnel who are likely to encounter individuals at risk ('gatekeepers'), and psychosocial treatments (3). However, we do not have robust estimates of the proportion of people that will visit a GP, have contact with gatekeepers or receive psychosocial treatments before they die from suicide. In order to best estimate the scope of these promising interventions and, accordingly, reinforce or redirect our efforts, we need to know what health services were, and were not, utilised by people in Australia in the period prior to suicide.

Psychotropic medicines have complex modifying effects on the risk of suicide, that may change substantially with age, indication, agent and duration (4). These medicines are also some of the most common substances used in suicide by poisoning (5). Currently, however, we do not know what medicines have been prescribed to people who die of suicide, and what proportion use their prescribed medicines for self-poisoning. This is key information for prescribers and could influence future means-restriction activities.

The Australian Suicide Prevention using Health Linked Data (ASHLi) project is a population-based case series study. The overarching aims are to describe and characterise the following for all suicides in Australia between 2013 and 2019:



1  
2  
3 1) health service utilisation rates (both general and mental health) in the year prior to death by  
4 suicide, and how this varies by individual case characteristics; and 2) prescribed medicines  
5 use in the year prior to death by suicide, medicines used in suicide by poisoning and how this  
6 varies by individual case characteristics.  
7  
8  
9  
10  
11  
12  
13  
14

### 15 ***Summary of existing literature***

#### 16 *Healthcare utilisation prior to suicide using administrative claims data*

17  
18 The most recent review of healthcare utilisation prior to suicide (6) incorporated 13 population-  
19 based studies using administrative claims and mortality data from six jurisdictions (USA,  
20 Denmark, Taiwan, Republic of Korea, Canada, Sweden). The study found that contact with  
21 primary healthcare professionals in the month before suicide ranged between 50% (USA  
22 between 2000–2010) and 73% (Taiwan in 2006 and Canada 1992–2000). In the 12 months  
23 preceding suicide, contact with a primary health professional ranged between 80% (Taiwan,  
24 2001–2004) and 92% (Canada 1998–2011). The ranges were considerably lower when the  
25 focus was on mental health contacts alone: from 7% (Sweden 1991–2003) to 30% (Canada,  
26 1998–2011) in the month before suicide. In the 12 months prior to death mental health contact  
27 ranged from 21% (UK, 1996–2005) to 25% (Sweden, 1991–2003). Therefore, estimates of  
28 healthcare contact prior to suicide are highly variable which may be partly due to differences  
29 in healthcare systems, study methodology and data quality. Importantly, there are pronounced  
30 within-country differences in healthcare contact based on characteristics such as sex, age (6)  
31 and race/ethnicity (7, 8).  
32  
33  
34  
35  
36  
37  
38  
39  
40  
41  
42  
43  
44  
45  
46  
47  
48  
49  
50  
51  
52  
53

#### 54 *Medicine use prior to suicide using administrative claims data and toxicology findings at time* 55 *of death* 56 57 58 59 60

1  
2  
3 Most analyses of medicine linked data have been population-based cohort studies focused on  
4 examining suicide risk amongst all users of individual drug classes within a population. We  
5 identified only one retrospective study linking coroner records with person-level dispensing  
6 data (9). This Northern Ireland study investigated the odds of suicide associated with  
7 prescription of mental health and pain medicines, compared to living controls from the general  
8 population. Use of both mental health and pain medicines were associated with higher odds of  
9 suicide; an unsurprising finding given both mental health problems and pain conditions  
10 increase the risk of suicide (10, 11). This study also uncovered that recent prescription of these  
11 medicines (i.e., in the 3 months preceding death) was associated with the highest risk of suicide,  
12 showing that pharmaceutical claims may have the ability to identify the emergence of mental  
13 health symptoms in the lead up to suicide.  
14  
15  
16  
17  
18  
19  
20  
21  
22  
23  
24  
25  
26  
27  
28  
29  
30

31 Other information about prior medicine use in people that have died from suicide comes from  
32 toxicology studies that investigate medicines detected at autopsy. A study investigating the  
33 relative toxicity of a number of antidepressant medicines used in overdose reported wide  
34 differences in toxicity between classes and recommended caution in prescribing particular  
35 medicines to high-risk patients (12). A Canadian study reported that opioids, sedatives, tricyclic  
36 antidepressants and over-the-counter medicines were the most frequent substances detected in  
37 overdose from coroner's toxicology reports, again with authors advising caution in prescribing  
38 and careful follow-up (5).  
39  
40  
41  
42  
43  
44  
45  
46  
47  
48  
49  
50

51  
52  
53 Autopsy studies to date have yielded important information for means restriction and clinical  
54 practice, yet interpreting medicine utilisation in autopsy-based analyses is subject to numerous  
55 limitations—it is unknown: (i) what medicines detected at autopsy were prescribed to the  
56  
57  
58  
59  
60

1  
2  
3 individual; or (ii) whether medicines not detected are because the individual was not prescribed  
4 the medicine; prescribed the medicine but not adherent at time of death; the samples collected  
5 were insufficient for toxicological analysis; or analyses conducted did not have the range or  
6 sensitivity to detect all therapeutic drug concentrations.  
7  
8  
9  
10  
11  
12  
13  
14

### 15 *Healthcare and medicine use in the general Australian population*

16  
17 In Australia, a wide range of health services are subsidised through the Medicare Benefits  
18 Scheme (MBS). Under the MBS all Australian citizens and residents receive subsidised  
19 healthcare for out-of-hospital medical services and are guaranteed free treatment in public  
20 hospitals. Using the MBS, the Australian Institute of Health and Welfare (AIHW) reported that  
21 88% of the Australian population visited a general practitioner (GP) in 2017–2018, but that the  
22 rate of use varied considerably depending on where people lived (13). Data show that people  
23 living in remote areas have poorer access to, and use of, health services compared to people  
24 living in major cities (14). In terms of mental health treatment, about 10% of the population  
25 received MBS-subsidised services in 2017–18; this rate was higher in females (12.2%) than  
26 males (8.3%) and people aged 35–44 accessed mental health services the most (13.8% of  
27 people in this age group) (15).  
28  
29  
30  
31  
32  
33  
34  
35  
36  
37  
38  
39  
40  
41  
42  
43  
44

45 The Pharmaceutical Benefits Scheme (PBS) was established to subsidise a wide range of  
46 prescription medicines for all Australian citizens and residents. Using the PBS data collection  
47 the AIHW determined that 16.8% of the Australian population received prescriptions for  
48 mental health related medicines in 2017–2018. Females had a higher proportion of mental  
49 health related prescriptions compared to males (20% vs. 13.6%). Antidepressants were the most  
50 common mental health medicine prescribed, followed by anxiolytics, sedatives and  
51 antipsychotics (15).  
52  
53  
54  
55  
56  
57  
58  
59  
60

## METHODS AND ANALYSIS

### *Design*

ASHLi is a population-based case series study, which will detail the health service and medicine history of all suicides identified through the National Coronial Information System (NCIS) that occurred in Australian residents on/after 1 July 2013. All suicides will be linked to health service and medicine use that occurred in the year prior to death.

### *Case definition*

The cases in our study are all deaths recorded by the NCIS as intentional or undetermined intent that occurred on/after 1st July 2013 until the 10<sup>th</sup> October 2019 (date of data extraction) across all Australian jurisdictions according to the following inclusion criteria:

- Case closed by coroner at the time of data extraction;
- Manner of death determined by the coroner to be intentional self-harm or undetermined intent.

The number of cases for each year are presented in Table 2.

**Table 2:** Number of suicide cases meeting study inclusion criteria per year, as identified by the NCIS access liaison officer

| Year of death     | Number of cases to be linked - AUSTRALIA | Number of cases to be linked – NSW | Percentage of all NCIS cases closed by coroner <sup>b</sup> |
|-------------------|------------------------------------------|------------------------------------|-------------------------------------------------------------|
| 2013 <sup>a</sup> | 1272                                     | 317                                | 96.5                                                        |
| 2014              | 2760                                     | 753                                | 95.0                                                        |
| 2015              | 2893                                     | 760                                | 93.0                                                        |
| 2016              | 2693                                     | 692                                | 92.9                                                        |
| 2017              | 2823                                     | 829                                | 75.6                                                        |
| 2018              | 1813                                     | 585                                | 50.8                                                        |
| 2019              | 285                                      | 128                                | 19.9                                                        |
| <b>Total</b>      | <b>14639</b>                             | <b>4064</b>                        |                                                             |

<sup>a</sup>Only cases after 1<sup>st</sup> July in 2013 were used

<sup>b</sup>At time of data extraction

Cases will also be confirmed using information from the National Death Index (NDI). Any suicide cases from the NCIS that are not coded as suicide in the NDI will still be treated as a case; however, the level of agreement between the two data sources will be reported. Only cases that are successfully linked to their PBS/MBS (for all cases) and NSW Health records (for NSW cases) will be included in further analyses.

### *Data sources*

Table 1 lists all the datasets that will be linked in ASHLi.

The National Coronial Information System (NCIS) captures Australia's coronial information for all deaths notified to a coroner since 2000, it is managed by the Victorian Department of Justice and Community Safety. All deaths that are intentional, accidental or of undetermined intent are reviewed by a coroner and hence suicides are well-captured. The NCIS carries detailed information, including demographics, autopsy and toxicology findings and details surrounding death (including method of death). Cases for which suicide is not a clear cause of death can be supported with information from the National Death Index (NDI), a national dataset of all causes of death held by the AIHW.

### *Australia-wide administrative data*

Australia maintains a publicly funded, universal healthcare system entitling all citizens and permanent residents to subsidised medicines through the PBS. The PBS reimburses community pharmacies and private hospitals for PBS-listed medicines (16). The PBS data captures approximately 93% of prescription medicine use in Australia (17). The PBS does not subsidise medicines sold over-the-counter, complementary and alternative medicines, private

1  
2  
3 prescriptions, medicines dispensed within public hospitals to inpatients, or opioid maintenance  
4 treatments (methadone and buprenorphine) and, therefore, these medicines do not appear in the  
5  
6 PBS collection. The MBS is Australia's government-funded healthcare subsidies scheme. The  
7  
8 scheme subsidises a wide range of both public and private medical services including  
9  
10 consultation fees for doctors and specialists, clinical psychology, diagnostic tests and  
11  
12 examinations and most surgical and therapeutic procedures.  
13  
14  
15  
16  
17  
18

### 19 *NSW administrative data*

20  
21 The NSW Emergency Department Data Collection (EDDC) collects data on presentations to  
22  
23 emergency departments of public hospitals in NSW. The NSW Admitted Patient Data  
24  
25 Collection (APDC) records all inpatient separations (discharges, transfers and deaths) from all  
26  
27 public, private, psychiatric and repatriation hospitals in NSW, as well as public multi-purpose  
28  
29 services, private day procedure centres and public nursing homes. The NSW Mental Health  
30  
31 Ambulatory Data Collection (MH-AMB) includes information in relation to mental health day  
32  
33 programs, psychiatric outpatients and outreach services (e.g. home visits). It also includes  
34  
35 information regarding care provided by hospital based consultation liaison services to admitted  
36  
37 patients in non-psychiatric and hospital emergency settings; care provided by community  
38  
39 workers and clients in staffed community residential settings, mental health promotion and  
40  
41 prevention services.  
42  
43  
44  
45  
46  
47  
48  
49  
50  
51  
52  
53  
54  
55  
56  
57  
58  
59  
60

**Table 1: Data sources to be linked [in ASHLi](#)**

| Data Set                       | Data Description                                                                                                                                                                                                                                                       | Data Provider                                          | Geographical Coverage | Coverage in years                         |
|--------------------------------|------------------------------------------------------------------------------------------------------------------------------------------------------------------------------------------------------------------------------------------------------------------------|--------------------------------------------------------|-----------------------|-------------------------------------------|
| Coronial Cases and Information | <a href="#">National repository containing data on deaths reported to a coroner in Australia and New Zealand. Register of all suicide deaths in Australia.</a>                                                                                                         | National Coronial Information System (NCIS)            | Australia-wide        | 1 July 2013–10 October 2019               |
| Medicines dispensing claims    | Australia's Pharmaceutical Benefits Scheme (PBS) is a national drug subsidy program for approved prescription medication and captures dispensing of all PBS-approved medicines in Australia.<br>Data will be extracted for each individual during the exposure period. | Australian Institute of Health and Welfare (AIHW)      | Australia-wide        | 1 July 2012–latest available before death |
| Health service records         | Medicare Benefits Scheme (MBS) is a listing of the Medicare services subsidised by the Australian government including any health care contacts, and any items used that are listed under the Mental Health Plan.                                                      | AIHW                                                   | Australia-wide        | 1 July 2012–latest available before death |
| Death records                  | The National Death Index (NDI) is a database developed and maintained by the Australian Institute of Health and Welfare in Canberra. The database is a listing of all deaths that have occurred in Australia since 1980.                                               | AIHW                                                   | Australia-wide        | 1 July 2013–latest available              |
| Admitted Patient Data          | Database that contains records of all inpatient separations (discharges, transfers and deaths) from all public, private, psychiatric and repatriation hospitals in NSW.                                                                                                | NSW Health Admitted Patient Data Collection (APDC)     | NSW                   | 1 July 2012–latest available              |
| Ambulatory Mental Health Data  | The MH-AMB collection is dedicated to the assessment, treatment, rehabilitation or care of non-admitted patients. It may include mental health day programs, psychiatric outpatients and outreach services (e.g., home visits). The                                    | NSW Health Data Ambulatory Mental Health Data (MH-AMB) | NSW                   | 1 July 2012–latest available              |

|                                      |                                                                                                                                                                                                                                                                                           |                                                             |     |                              |
|--------------------------------------|-------------------------------------------------------------------------------------------------------------------------------------------------------------------------------------------------------------------------------------------------------------------------------------------|-------------------------------------------------------------|-----|------------------------------|
|                                      | data records 'contacts' (as opposed to 'episodes of care') by clinicians to a patient.                                                                                                                                                                                                    |                                                             |     |                              |
| Emergency Department Data Collection | The EDDC provides information about patient presentations to the emergency departments of public hospitals in New South Wales. By 2016 the EDDC captured 100% of public hospitals in NSW, prior to this time the number of contributing hospitals steadily increased from 90/150 in 2010. | NSW Health Data Emergency Department Data Collection (EDDC) | NSW | 1 July 2012–latest available |



## Measurements

### *Data from coroner reports*

The information from the NCIS that will be extracted for each suicide is listed in Table 3. Data extraction from the toxicology, police and autopsy reports will be completed by research assistants and students. Study investigators (KC, RC and JP) will provide training in the data extraction processes and will be available to address any questions and reach consensus regarding coding for more complex cases.

Table 3: Information collected from the NCIS for each included suicide case

| Variable(s)                                | Description                                                                                                                                                                                                                                                                |
|--------------------------------------------|----------------------------------------------------------------------------------------------------------------------------------------------------------------------------------------------------------------------------------------------------------------------------|
| <b>De-identified demographic variables</b> | Date of death, age at time of death, sex, marital status, employment status, country of birth, years in country                                                                                                                                                            |
| <b>ICD-10 Cause of Death</b>               | As determined during the Australian Bureau of Statistics mortality coding process                                                                                                                                                                                          |
| <b>Medical Cause of Death</b>              | As determined by the coroner                                                                                                                                                                                                                                               |
| <b>Incident date and time</b>              | When the incident that caused death occurred                                                                                                                                                                                                                               |
| <b>Mechanism and Object of Injury</b>      | Mechanism by which death occurred/objects involved in death                                                                                                                                                                                                                |
| <b>Geocoding result</b>                    | Statistical Area 3 (SA3) and 4 (SA4) of residential address at time of death. Statistical areas are provided by the Australian Statistical Geography Standard for use by the Australian Bureau of statistics (ABS) and others to analyse spatially integrated information. |

|                          |                                                                                                                                                                                                         |
|--------------------------|---------------------------------------------------------------------------------------------------------------------------------------------------------------------------------------------------------|
| <b>Toxicology report</b> | We will document all drugs listed in each report, including their concentrations, the sample sites analysed, level of decomposition of the body and any other limitations to the toxicological testing. |
|--------------------------|---------------------------------------------------------------------------------------------------------------------------------------------------------------------------------------------------------|

#### *Data from PBS and MBS*

The data from the PBS that will be linked to each case includes date the medicine was prescribed and date the medicine was dispensed, medicine name, form, strength, number of prescriptions dispensed, and speciality of the prescriber. The data from the MBS that will be linked to each case includes date and type of health service accessed.

#### *Data from the APDC, EDDC and MH-AMB*

Data from the APDC and EDDC that will be linked to each case includes dates of episodes of care, diagnosis codes associated with episode of care, and mode of arrival and separation. Additionally, the triage category assigned to ED visits will be linked. Data from the MH-AMB that will be linked to each case includes dates associated with each contact, mental health diagnoses associated with contact and type of service.

#### **Data linkage**

The data linkage in this study will adhere to the separation principle for data linkage. Identifying information is supplied to the data linkage staff by the NCIS data custodians. Once the relevant linkage processes have been performed, de-identified data will then be available to researchers for analyses.

The separation principle will be maintained throughout the data linkage process as follows:

1. The researchers will not have access to identifying information once they have received the linked data
2. Only approved research personnel will have access to the linked data and perform data analysis

### ***Planned data analysis***

*Aim 1:* To describe health service utilisation rates (both general and mental health) in the year prior to death by suicide, and how this varies by individual case characteristics

Using descriptive statistics, we will comprehensively describe and characterise the healthcare utilisation in the NSW cases within our sample in the year preceding suicide death by using the NSW Health data supplied by NSW Health and the MBS data supplied by AIHW. Categorical data will be described using frequencies and percentages.

Generalised linear models will be used to determine predictors of healthcare contacts before death. The dependent healthcare utilisation variables we will investigate include ambulatory mental health contact, acute mental health contact and no mental health contact. Independent variables and covariates examined will include: age, sex, SES, and class of medication prescribed. Odds ratios with 95% CIs will be reported for each predictor.

Spatial maps of age and sex standardised suicide rate according to the presence or absence of healthcare within a month of death will be generated for Australia using SA3 regions of residence at time of death.

*Aim 2:* To describe prescribed medicines use in the year prior to death by suicide, medicines used in suicide by poisoning and how this varies by individual case characteristics.

Using descriptive statistics, we will comprehensively describe and characterise the dispensed prescription medication use in our sample in the year preceding suicide death using the PBS data supplied by AIHW. Categorical data will be described using frequencies and percentages.

1  
2  
3 For the prescription medicines that are not used to treat mental illness, such as antibiotics, ACE  
4 inhibitors, gabapentinoids or isotretinoin, we will conduct disproportionality analysis (18) to determine  
5 whether the rate of use in suicide cases is above that reported in the Australian population using other  
6 available sources of national representative PBS dispensing data.  
7  
8  
9  
10  
11

12  
13 Spatial maps of suicide according to the presence or absence of medicine within a month of death will  
14 be generated for Australia using SA3 regions of residence at time of death.  
15  
16  
17

## 18 19 20 **ETHICS AND FUNDING**

21  
22 This study has been approved by the following data custodians and ethics committees: 1) the National  
23 Coronial Information System (NCIS) (REF: M0400), 2) the Justice Department Human Research  
24 Ethics Committee (REF: CF/17/23250), 3) the Western Australian Coroners Court (REF: EC 14/18  
25 M0400); 4) the Australian Institute of Health and Welfare (REF: EO2017/4/366), 5) the Department  
26 of Health; and 6) NSW Population & Health Services Research Ethics Committee  
27 (REF:2017/HRE1204). This study has received funding from the National Health and Medical  
28 Research Council (NHMRC) (REF: APP1157757).  
29  
30  
31  
32  
33  
34  
35  
36  
37  
38  
39

## 40 41 **LIMITATIONS**

42  
43 There will be an underascertainment of health service use for the cases in our study. MBS data  
44 does not include enough detail on mental health services provided in hospital to allow the  
45 identification of hospitalised self-harm and other emergency psychiatric presentations. Health service  
46 data collected by State governments includes detailed data on hospitalisations and non-hospital  
47 mental health services, therefore is not constrained by the same limitations. Therefore we will  
48 supplement the MBS mental health data using NSW state data collections. Initially, we have chosen  
49 to use this approach in NSW given its large population (around one third of Australians). By  
50 comparing the estimates we receive from MBS alone to MBS plus NSW state collections we will be  
51  
52  
53  
54  
55  
56  
57  
58  
59  
60

1  
2  
3 able to estimate the degree of underascertainment in other states in Australia and report on this  
4  
5 accordingly.  
6  
7

8 Medicine use will also be limited by under-ascertainment. It is possible to obtain scripts outside the  
9  
10 PBS, such as private prescriptions, medicines dispensed within public hospitals to inpatients, or  
11  
12 opioid maintenance treatments (methadone and buprenorphine) will not be captured. The study will  
13  
14 also not capture medicines sold over-the-counter, complementary or alternative medicines.  
15  
16

17  
18 Another limitation is that all cases in the study have died from suicide, therefore risk of suicide  
19  
20 associated with any healthcare or medicine use patterns can not be established. This study will instead  
21  
22 highlight these patterns, so that further studies with appropriate control groups can be established.  
23  
24  
25

## 26 27 28 **IMPLICATIONS AND SIGNIFICANCE** 29

30  
31 Australia is one of the few countries in the world with an investment in data linkage infrastructure to  
32  
33 allow a project of this scope to be achieved. This study will significantly advance knowledge of health  
34  
35 service and medicine utilisation prior to suicide in Australia. The project outcomes will have a  
36  
37 significant impact on suicide prevention initiatives by identifying gaps in our national suicide  
38  
39 prevention strategy, and subsequently providing information on ways to optimise future approaches.  
40  
41  
42  
43  
44  
45

46 ASHLi will result in the following central outcomes:  
47  
48

- 49 1. *Identifying the reach of suicide prevention initiatives delivered via health services.*

50  
51 By identifying population characteristics associated with different types of health service use, this  
52  
53 analysis will provide important information for targeting suicide initiatives. For example, if one type  
54  
55 of service is used more commonly in younger females then reinforcing tailored programs toward this  
56  
57 group within that service may increase efficacy of suicide prevention compared to broadly focussed  
58  
59  
60

1  
2  
3 interventions. Furthermore, locating where high/low service use occurs and determining when, in  
4 relation to suicide, particular services are most commonly accessed, the analysis will provide specific  
5 information about where and when to reinforce or redirect our current strategies.  
6  
7  
8  
9

## 10 2. *Highlighting barriers to health service utilisation.*

11  
12 By interpreting health service use in concert with health service location we will shed light on whether  
13 barriers to health service utilisation may be due to intrinsic factors (unwillingness by the individual to  
14 seek help) vs. extrinsic factors (remoteness/lack of services). The former will highlight groups of  
15 people for whom non-clinical forms of intervention may be the most efficacious and where they should  
16 be targeted (i.e. online therapy, restricting means of suicide, public health campaigns).  
17  
18  
19  
20  
21  
22  
23  
24

## 25 3. *Providing information to help target means restriction.*

26  
27 Means restriction is the primary mode of suicide prevention applicable to those who do not access  
28 health services. Our analysis of the methods of suicide that are most commonly used in these people  
29 will provide information on priority suicide methods to target, in what populations, and where.  
30  
31  
32  
33  
34

## 35 4. *Highlighting potentially harmful medicine use.*

36  
37 Information on medicines used in overdose will have important implications for regulatory authorities  
38 and prescribers, especially when psychotropic medicine use occurs in the absence of mental health  
39 service utilisation, which is against best practice recommendations. We will also provide further  
40 evidence regarding concerns about pro-suicidal effects of several non-psychotropic medicines.  
41  
42  
43  
44  
45  
46

## 47 5. *Foundational research for future studies*

48  
49 The rich data source created in order to achieve the aims of the current proposal will be used for many  
50 further analyses by the study team. For example, with the addition of appropriate data from the general  
51 population, we can zoom in on particular medicine classes of interest and conduct disproportionality  
52 analysis to assess how use of medicines by our sample differs compared to the general population.  
53  
54  
55  
56  
57  
58  
59  
60

1  
2  
3  
4  
5  
6  
7  
8  
9  
10  
11  
12  
13  
14  
15  
16  
17  
18  
19  
20  
21  
22  
23  
24  
25  
26  
27  
28  
29  
30  
31  
32  
33  
34  
35  
36  
37  
38  
39  
40  
41  
42  
43  
44  
45  
46  
47  
48  
49  
50  
51  
52  
53  
54  
55  
56  
57  
58  
59  
60

For peer review only

1  
2  
3 **Contributors:** The Principal Investigator (KC) and NB were responsible for the conceptualisation of  
4 ASHLi, KC, JP, RC, AS, NB, AP, GC, JR, SP were responsible for the protocol design. The manuscript  
5 was drafted by KC and NG. All authors contributed to the final version.  
6  
7  
8  
9

10  
11  
12  
13 **Funding:** This study is funded by a grant from the National Health and Medical Research Centre  
14 (NHMRC, REF: APP1157757) and the Translational Australian Clinical Toxicology Research Group  
15 (TACT). An NHMRC Early Career Fellowship funds KC (Grant number: 1122362). The funding  
16 organizations played no part in the design of the study; nor in the preparation, review, or approval of  
17 the manuscript.  
18  
19  
20  
21  
22  
23  
24

#### 25 **Patient and Public Involvement Statement**

26 There were no funds or time allocated for patient and public involvement, so we were unable to  
27 involve the public in the design of the study. However, we will develop a representative public  
28 committee to help us develop our dissemination strategy to mental health advocacy groups and the  
29 community.  
30  
31  
32  
33  
34  
35  
36

37 **Competing interests:** None  
38  
39  
40  
41  
42  
43

44 **Data Sharing Statement:** Only approved personnel may access the data. Researchers interested in  
45 collaborations or further information are invited to contact KC at [kate.chitty@sydney.edu.au](mailto:kate.chitty@sydney.edu.au).  
46  
47  
48  
49

50 **Acknowledgements:** We would like to thank the National Coronial Information System (NCIS) which  
51 is managed by the Victorian Department of Justice and Community Safety, ~~and the~~ Centre for Health  
52 Record Linkage (CHeReL) ~~and the NSW Ministry of Health~~.  
53  
54  
55  
56  
57  
58  
59  
60



## References

1. WHO: Preventing suicide: A global imperative. Geneva; 2014.
2. Australian Bureau of Statistics. 3303.0 - Causes of Death, Australia, 2018. 2019.
3. Kryszynska K, Batterham PJ, Tye M, Shand F, Calear AL, Cockayne N, et al. Best strategies for reducing the suicide rate in Australia. *The Australian and New Zealand journal of psychiatry*. 2016;50(2):115-8.
4. Zalsman G, Hawton K, Wasserman D, van Heeringen K, Arensman E, Sarchiapone M, et al. Suicide prevention strategies revisited: 10-year systematic review. *The Lancet Psychiatry*. 2016;3(7):646-59.
5. Sinyor M, Howlett A, Cheung AH, Schaffer A. Substances used in completed suicide by overdose in Toronto: an observational study of coroner's data. *Canadian journal of psychiatry Revue canadienne de psychiatrie*. 2012;57(3):184-91.
6. Stene-Larsen K, Reneflot A. Contact with primary and mental health care prior to suicide: A systematic review of the literature from 2000 to 2017. *Scandinavian journal of public health*. 2017;1403494817746274.
7. Ahmedani BK, Stewart C, Simon GE, Lynch F, Lu CY, Waitzfelder BE, et al. Racial/Ethnic differences in health care visits made before suicide attempt across the United States. *Med Care*. 2015;53(5):430-5.
8. Svetcic J, Milner A, De Leo D. Contacts with mental health services before suicide: a comparison of Indigenous with non-Indigenous Australians. *General hospital psychiatry*. 2012;34(2):185-91.
9. O'Neill S, Graham B, Ennis E. Prescribed pain and mental health medication prior to suicide: A population based case control study. *Journal of affective disorders*. 2019;246:195-200.
10. Ilgen MA, Kleinberg F, Ignacio RV, Bohnert AS, Valenstein M, McCarthy JF, et al. Noncancer pain conditions and risk of suicide. *JAMA psychiatry*. 2013;70(7):692-7.
11. Ferrari AJ, Norman RE, Freedman G, Baxter AJ, Pirkis JE, Harris MG, et al. The burden attributable to mental and substance use disorders as risk factors for suicide: findings from the Global Burden of Disease Study 2010. *PloS one*. 2014;9(4):e91936.
12. Hawton K, Bergen H, Simkin S, Cooper J, Waters K, Gunnell D, et al. Toxicity of antidepressants: rates of suicide relative to prescribing and non-fatal overdose. *The British journal of psychiatry : the journal of mental science*. 2010;196(5):354-8.
13. AIHW: Medicare-subsidised GP, allied health and specialist health care across local areas: 2013–14 to 2017–18. 2019.
14. AIHW 2016. Australia's health 2016. Australia's health no. 15. Cat. no. AUS 199. Canberra: AIHW.
15. AIHW. Mental Health Services in brief 2019. 2019.
16. Mellish L, Karanges EA, Litchfield MJ, Schaffer AL, Blanch B, Daniels BJ, et al. The Australian Pharmaceutical Benefits Scheme data collection: a practical guide for researchers. *BMC Research Notes*. 2015;8(1):634.
17. Australian Government Department of Health. Australian statistics on medicine 2011. . Canberra: Australian Government Department of Health; 2013.
18. Caster O, Aoki Y, Gattepaille LM, Grundmark B. Disproportionality Analysis for Pharmacovigilance Signal Detection in Small Databases or Subsets: Recommendations for Limiting False-Positive Associations. *Drug safety*. 2020.

# BMJ Open

## Australian Suicide Prevention using Health-Linked Data (ASHLi): A population-based case series study

|                                 |                                                                                                                                                                                                                                                                                                                                                                                                                                                                                                                                                                                                                                                                                                                                                                                                                                                                                                       |
|---------------------------------|-------------------------------------------------------------------------------------------------------------------------------------------------------------------------------------------------------------------------------------------------------------------------------------------------------------------------------------------------------------------------------------------------------------------------------------------------------------------------------------------------------------------------------------------------------------------------------------------------------------------------------------------------------------------------------------------------------------------------------------------------------------------------------------------------------------------------------------------------------------------------------------------------------|
| Journal:                        | <i>BMJ Open</i>                                                                                                                                                                                                                                                                                                                                                                                                                                                                                                                                                                                                                                                                                                                                                                                                                                                                                       |
| Manuscript ID                   | bmjopen-2020-038181.R1                                                                                                                                                                                                                                                                                                                                                                                                                                                                                                                                                                                                                                                                                                                                                                                                                                                                                |
| Article Type:                   | Protocol                                                                                                                                                                                                                                                                                                                                                                                                                                                                                                                                                                                                                                                                                                                                                                                                                                                                                              |
| Date Submitted by the Author:   | 09-Apr-2020                                                                                                                                                                                                                                                                                                                                                                                                                                                                                                                                                                                                                                                                                                                                                                                                                                                                                           |
| Complete List of Authors:       | Chitty, Kate; The University of Sydney Faculty of Medicine and Health, Pharmacology<br>Schumann, Jennifer; Monash University, Victorian Institute of Forensic Medicine<br>Schaffer, Andrea; University of New South Wales, Centre for Big Data Research in Health<br>Cairns, Rose; The Children's Hospital at Westmead, NSW Poisons Information Centre; The University of Sydney, Sydney Pharmacy School<br>Gonzaga, Nicole; The University of Sydney, Pharmacology<br>Raubenheimer, Jacques; University of Sydney, Discipline of Pharmacology<br>Carter, Gregory; University of Newcastle, Australia, Calvary Mater Newcastle Hospital<br>Page, Andrew; Western Sydney University - Campbelltown Campus, Translational Health Research Institute<br>Pearson, Sallie-Anne; University of New South Wales, Medicines Policy Research Unit<br>Buckley, Nicholas; The University of Sydney, Pharmacology |
| <b>Primary Subject Heading</b>: | Public health                                                                                                                                                                                                                                                                                                                                                                                                                                                                                                                                                                                                                                                                                                                                                                                                                                                                                         |
| Secondary Subject Heading:      | Epidemiology                                                                                                                                                                                                                                                                                                                                                                                                                                                                                                                                                                                                                                                                                                                                                                                                                                                                                          |
| Keywords:                       | Suicide & self-harm < PSYCHIATRY, HEALTH SERVICES ADMINISTRATION & MANAGEMENT, MENTAL HEALTH, EPIDEMIOLOGY                                                                                                                                                                                                                                                                                                                                                                                                                                                                                                                                                                                                                                                                                                                                                                                            |
|                                 |                                                                                                                                                                                                                                                                                                                                                                                                                                                                                                                                                                                                                                                                                                                                                                                                                                                                                                       |

SCHOLARONE™  
Manuscripts



I, the Submitting Author has the right to grant and does grant on behalf of all authors of the Work (as defined in the below author licence), an exclusive licence and/or a non-exclusive licence for contributions from authors who are: i) UK Crown employees; ii) where BMJ has agreed a CC-BY licence shall apply, and/or iii) in accordance with the terms applicable for US Federal Government officers or employees acting as part of their official duties; on a worldwide, perpetual, irrevocable, royalty-free basis to BMJ Publishing Group Ltd ("BMJ") its licensees and where the relevant Journal is co-owned by BMJ to the co-owners of the Journal, to publish the Work in this journal and any other BMJ products and to exploit all rights, as set out in our [licence](#).

The Submitting Author accepts and understands that any supply made under these terms is made by BMJ to the Submitting Author unless you are acting as an employee on behalf of your employer or a postgraduate student of an affiliated institution which is paying any applicable article publishing charge ("APC") for Open Access articles. Where the Submitting Author wishes to make the Work available on an Open Access basis (and intends to pay the relevant APC), the terms of reuse of such Open Access shall be governed by a Creative Commons licence – details of these licences and which [Creative Commons](#) licence will apply to this Work are set out in our licence referred to above.

Other than as permitted in any relevant BMJ Author's Self Archiving Policies, I confirm this Work has not been accepted for publication elsewhere, is not being considered for publication elsewhere and does not duplicate material already published. I confirm all authors consent to publication of this Work and authorise the granting of this licence.

1  
2  
3 Australian Suicide Prevention using Health-Linked Data (ASHLi):  
4  
5

6 A population-based case series study  
7  
8  
9

10  
11  
12 Kate M. Chitty<sup>1</sup>, Jennifer L. Schumann<sup>2</sup>, Andrea Schaffer<sup>3</sup>, Rose Cairns<sup>4</sup>, Nicole J. Gonzaga<sup>1</sup>,  
13  
14 Jacques E. Raubenheimer,<sup>1</sup> Gregory Carter<sup>5</sup>, Andrew Page<sup>6</sup>, Sallie A. Pearson<sup>3</sup>, Nicholas A.  
15  
16 Buckley<sup>1</sup>  
17

- 18  
19  
20 1 University of Sydney, Faculty of Medicine and Health, Discipline of Pharmacology,  
21  
22 Clinical Pharmacology and Toxicology Research Group, Sydney, Australia  
23  
24 2 Victorian Institute of Forensic Medicine, Department of Forensic Medicine, Monash  
25  
26 University, Southbank, Victoria, Australia  
27  
28 3 Centre for Big Data Research in Health, UNSW Sydney, Australia  
29  
30 4 University of Sydney, School of Pharmacy  
31  
32 5 Calvary Mater Newcastle , Dept. Consultation-Liaison Psychiatry, Australia  
33  
34 6 Translational Health Research Institute, Western Sydney University, Australia  
35  
36  
37  
38  
39  
40  
41

42 Corresponding author: Kate M Chitty

43 Discipline of Pharmacology, School of Medical Sciences, Medicine and Health University of  
44  
45 Sydney, Sydney, Australia

46 Building K06, Level 3, Room 307A, 1 – 3 Ross St, The University of Sydney, NSW 2006

47  
48 T: +61 2 9351 8709

49  
50 E: [kate.chitty@sydney.edu.au](mailto:kate.chitty@sydney.edu.au)  
51  
52  
53  
54  
55  
56  
57  
58  
59  
60

## ABSTRACT

**Introduction:** In Australia suicide is the leading cause of death for people aged 15 - 44. Health professionals deliver most of our key suicide prevention strategies via health services, but other efficacious population-level strategies include means restriction and public awareness campaigns. Currently, we have no population-level data allowing us to determine which individuals, in what parts of Australia, are likely to utilise our most promising interventions delivered by health services. The aims of this study are to describe: 1) health service utilisation rates in the year prior to death by suicide, and how this varies by individual case characteristics; 2) prescribed medicines use in the year prior to death by suicide, medicines used in suicide by poisoning and how this varies by individual case characteristics.

**Methods and analysis:** This is a population-based case series study of all suicide cases in Australia identified through the National Coronial Information System (NCIS) from 2013 - 2019. Cases will be linked to administrative claims data detailing health service use and medicines dispensed in the year before death. We will also obtain findings from the coronial enquiry, including toxicology. Descriptive statistics will be produced to characterise health service and prescribed medicine use and how utilisation varies by age, sex, method of death and socio-economic status. We will explore the geographical variability of health service and medicine use, highlighting regions in Australia associated with more limited access.

**Ethics and dissemination:** This project involves use of sensitive and confidential data. Data will be linked using a third-party privacy preserving protocol meaning that investigators will not have access to identifiable information once the data has been linked. Statistical analyses will be carried out in a secure environment. This study has been approved by the following ethics committees: 1) the Justice Department Human Research Ethics Committee (REF: CF/17/23250), 2) the Western Australian Coroners Court (REF: EC 14/18 M0400); 3) the Australian Institute of Health and Welfare (REF: EO2017/4/366), 4) NSW Population & Health

1  
2  
3 Services Research Ethics Committee (REF:2017/HRE1204). Findings will be published in  
4 peer-reviewed journals, presented at conferences and communicated to regulatory authorities,  
5  
6 clinicians and policy makers.  
7  
8  
9  
10  
11  
12  
13  
14  
15  
16

17 **Keywords:** Retrospective, Suicides, Medicines, Administrative data, Data linkage, mental  
18 health, health service utilisation, epidemiology  
19  
20  
21  
22  
23  
24  
25  
26  
27  
28  
29  
30  
31  
32  
33  
34  
35  
36  
37  
38  
39  
40  
41  
42  
43  
44  
45  
46  
47  
48  
49  
50  
51  
52  
53  
54  
55  
56  
57  
58  
59  
60

### STRENGTHS AND LIMITATIONS OF THIS STUDY

- This is a population-based case series study of all suicide cases in Australia from 2013 – 2019.
- Coronial data will be linked to individual dispensing records for prescribed medicines, to create a comprehensive view of medicine access at time of death.
- By measuring geographical variability of health service use across the cohort, we will highlight regions in Australia with reduced access to these important avenues for suicide prevention.
- All cases in the study have died from suicide, therefore risk of suicide can not be established.

## INTRODUCTION

### *Background*

Suicide prevention is a worldwide public health priority (1). In Australia suicide is the leading cause of years of potential life lost, the leading cause of death for people aged between 15 and 44, and suicide rates have remained largely unchanged over the past decade (2).

The most effective suicide prevention strategies delivered by health services in Australia includes training general practitioners (GPs) to identify and support people in distress, similar training for other health personnel who are likely to encounter individuals at risk ('gatekeepers') and implementation of psychosocial treatments (3). However, we do not have robust estimates of the proportion of people that will visit a GP, have contact with gatekeepers or receive psychosocial treatments before they die from suicide. In order to best estimate the scope of these promising interventions and, accordingly, reinforce or redirect our efforts, we need to know what health services were, and were not, utilised by people in Australia in the period prior to suicide.

Psychotropic medicines have complex modifying effects on the risk of suicide, that may change substantially with age, indication, agent and duration (4). These medicines are also some of the most common substances used in suicide by poisoning (5). Currently, however, we do not know what medicines have been prescribed to people who die of suicide, and what proportion use their prescribed medicines for self-poisoning. This is key information for prescribers and could influence future means-restriction activities.

The Australian Suicide Prevention using Health Linked Data (ASHLi) project is a population-based case series study. The overarching aims are to describe and characterise the following for all suicides in Australia between 2013 and 2019:



1  
2  
3 1) health service utilisation rates (both general and mental health) in the year prior to death by  
4 suicide, and how this varies by individual case characteristics; and 2) prescribed medicines  
5 use in the year prior to death by suicide, medicines used in suicide by poisoning and how this  
6 varies by individual case characteristics.  
7  
8  
9  
10  
11  
12  
13  
14

### 15 ***Summary of existing literature***

#### 16 *Healthcare utilisation prior to suicide using administrative claims data*

17  
18  
19 The most recent review of healthcare utilisation prior to suicide (6) incorporated 13 population-  
20 based studies using administrative claims and mortality data from six jurisdictions (USA,  
21 Denmark, Taiwan, Republic of Korea, Canada, Sweden). The study found that contact with  
22 primary healthcare professionals in the month before suicide ranged between 50% (USA  
23 between 2000–2010) and 73% (Taiwan in 2006 and Canada 1992–2000). In the 12 months  
24 preceding suicide, contact with a primary health professional ranged between 80% (Taiwan,  
25 2001–2004) and 92% (Canada 1998–2011). The ranges were considerably lower when the  
26 focus was on mental health contacts alone: from 7% (Sweden 1991–2003) to 30% (Canada,  
27 1998–2011) in the month before suicide. In the 12 months prior to death mental health contact  
28 ranged from 21% (UK, 1996–2005) to 25% (Sweden, 1991–2003). Therefore, estimates of  
29 healthcare contact prior to suicide are highly variable which may be partly due to differences  
30 in healthcare systems, study methodology and data quality. Importantly, there are pronounced  
31 within-country differences in healthcare contact based on characteristics such as sex, age (6)  
32 and race/ethnicity (7, 8).  
33  
34  
35  
36  
37  
38  
39  
40  
41  
42  
43  
44  
45  
46  
47  
48  
49  
50  
51  
52  
53

#### 54 *Medicine use prior to suicide using administrative claims data and toxicology findings at time* 55 *of death* 56 57 58 59 60

1  
2  
3 Most analyses of medicine linked data have been population-based cohort studies focused on  
4 examining suicide risk amongst all users of individual drug classes within a population. We  
5 identified only one retrospective study linking coroner records with person-level dispensing  
6 data (9). This Northern Ireland study investigated the odds of suicide associated with  
7 prescription of mental health and pain medicines, compared to living controls from the general  
8 population. Use of both mental health and pain medicines were associated with higher odds of  
9 suicide; an unsurprising finding given both mental health problems and pain conditions  
10 increase the risk of suicide (10, 11). This study also uncovered that recent prescription of these  
11 medicines (i.e., in the 3 months preceding death) was associated with the highest risk of suicide,  
12 showing that pharmaceutical claims may have the ability to identify the emergence of mental  
13 health symptoms in the lead up to suicide.  
14  
15  
16  
17  
18  
19  
20  
21  
22  
23  
24  
25  
26  
27  
28  
29  
30

31 Other information about prior medicine use in people that have died from suicide comes from  
32 toxicology studies that investigate medicines detected at autopsy. A study investigating the  
33 relative toxicity of a number of antidepressant medicines used in overdose reported wide  
34 differences in toxicity between classes and recommended caution in prescribing particular  
35 medicines to high-risk patients (12). A Canadian study reported that opioids, sedatives, tricyclic  
36 antidepressants and over-the-counter medicines were the most frequent substances detected in  
37 overdose from coroner's toxicology reports, again with authors advising caution in prescribing  
38 and careful follow-up (5).  
39  
40  
41  
42  
43  
44  
45  
46  
47  
48  
49  
50

51  
52  
53 Autopsy studies to date have yielded important information for means restriction and clinical  
54 practice, yet interpreting medicine utilisation in autopsy-based analyses is subject to numerous  
55 limitations—it is unknown: (i) what medicines detected at autopsy were prescribed to the  
56  
57  
58  
59  
60

1  
2  
3 individual; or (ii) whether medicines not detected are because the individual was not prescribed  
4 the medicine; prescribed the medicine but not adherent at time of death; the samples collected  
5 were insufficient for toxicological analysis; or analyses conducted did not have the range or  
6 sensitivity to detect all therapeutic drug concentrations.  
7  
8  
9  
10  
11  
12  
13  
14

### 15 *Healthcare and medicine use in the general Australian population*

16  
17 In Australia, a wide range of health services are subsidised through the Medicare Benefits  
18 Scheme (MBS). Under the MBS all Australian citizens and residents receive subsidised  
19 healthcare for out-of-hospital medical services and are guaranteed free treatment in public  
20 hospitals. Using the MBS, the Australian Institute of Health and Welfare (AIHW) reported that  
21 88% of the Australian population visited a general practitioner (GP) in 2017–2018, but that the  
22 rate of use varied considerably depending on where people lived (13). Data show that people  
23 living in remote areas have poorer access to, and use of, health services compared to people  
24 living in major cities (14). In terms of mental health treatment, about 10% of the population  
25 received MBS-subsidised services in 2017–18; this rate was higher in females (12.2%) than  
26 males (8.3%) and people aged 35–44 accessed mental health services the most (13.8% of  
27 people in this age group) (15).  
28  
29  
30  
31  
32  
33  
34  
35  
36  
37  
38  
39  
40  
41  
42  
43  
44

45 The Pharmaceutical Benefits Scheme (PBS) was established to subsidise a wide range of  
46 prescription medicines for all Australian citizens and residents. Using the PBS data collection  
47 the AIHW determined that 16.8% of the Australian population received prescriptions for  
48 mental health related medicines in 2017–2018. Females had a higher proportion of mental  
49 health related prescriptions compared to males (20% vs. 13.6%). Antidepressants were the most  
50 common mental health medicine prescribed, followed by anxiolytics, sedatives and  
51 antipsychotics (15).  
52  
53  
54  
55  
56  
57  
58  
59  
60

## METHODS AND ANALYSIS

### *Design*

ASHLi is a population-based case series study, which will detail the health service and medicine history of all suicides identified through the National Coronial Information System (NCIS) that occurred in Australian residents on/after 1 July 2013. All suicides will be linked to health service and medicine use that occurred in the year prior to death.

### *Case definition*

The cases in our study are all deaths recorded by the NCIS as intentional or undetermined intent that occurred on/after 1st July 2013 until the 10<sup>th</sup> October 2019 (date of data extraction) across all Australian jurisdictions according to the following inclusion criteria:

- Case closed by coroner at the time of data extraction;
- Manner of death determined by the coroner to be intentional self-harm or undetermined intent.

The number of cases for each year are presented in Table 1.

**Table 1:** Number of suicide cases meeting study inclusion criteria per year, as identified by the NCIS access liaison officer

| Year of death     | Number of cases to be linked - AUSTRALIA | Number of cases to be linked – NSW | Percentage of all NCIS cases closed by coroner <sup>b</sup> |
|-------------------|------------------------------------------|------------------------------------|-------------------------------------------------------------|
| 2013 <sup>a</sup> | 1272                                     | 317                                | 96.5                                                        |
| 2014              | 2760                                     | 753                                | 95.0                                                        |
| 2015              | 2893                                     | 760                                | 93.0                                                        |
| 2016              | 2693                                     | 692                                | 92.9                                                        |
| 2017              | 2823                                     | 829                                | 75.6                                                        |
| 2018              | 1813                                     | 585                                | 50.8                                                        |
| 2019              | 285                                      | 128                                | 19.9                                                        |
| <b>Total</b>      | <b>14639</b>                             | <b>4064</b>                        |                                                             |

<sup>a</sup>Only cases after 1<sup>st</sup> July in 2013 were used

1  
2  
3 <sup>b</sup>At time of data extraction  
4  
5  
6  
7

8 Cases will also be confirmed using information from the National Death Index (NDI). Any  
9  
10 suicide cases from the NCIS that are not coded as suicide in the NDI will still be treated as a  
11  
12 case; however, the level of agreement between the two data sources will be reported. Only  
13  
14 cases that are successfully linked to their PBS/MBS (for all cases) and NSW Health records  
15  
16 (for NSW cases) will be included in further analyses.  
17  
18  
19  
20  
21

### 22 ***Data sources***

23  
24 Table 2 lists all the datasets that will be linked in ASHLi.

25  
26 The National Coronial Information System (NCIS) captures Australia's coronial information  
27  
28 for all deaths notified to a coroner since 2000, it is managed by the Victorian Department of  
29  
30 Justice and Community Safety. All deaths that are intentional, accidental or of undetermined  
31  
32 intent are reviewed by a coroner and hence suicides are well-captured. The NCIS carries  
33  
34 detailed information, including demographics, autopsy and toxicology findings and details  
35  
36 surrounding death (including method of death). Cases for which suicide is not a clear cause of  
37  
38 death can be supported with information from the National Death Index (NDI), a national  
39  
40 dataset of all causes of death held by the AIHW.  
41  
42  
43  
44  
45  
46  
47

### 48 ***Australia-wide administrative data***

49  
50 Australia maintains a publicly funded, universal healthcare system entitling all citizens and  
51  
52 permanent residents to subsidised medicines through the PBS. The PBS reimburses community  
53  
54 pharmacies and private hospitals for PBS-listed medicines (16). The PBS data captures  
55  
56 approximately 93% of prescription medicine use in Australia (17). The PBS does not subsidise  
57  
58 medicines sold over-the-counter, complementary and alternative medicines, private  
59  
60

1  
2  
3 prescriptions, medicines dispensed within public hospitals to inpatients, or opioid maintenance  
4 treatments (methadone and buprenorphine) and, therefore, these medicines do not appear in the  
5 PBS collection. The MBS is Australia's government-funded healthcare subsidies scheme. The  
6 scheme subsidises a wide range of both public and private medical services including  
7 consultation fees for doctors and specialists, clinical psychology, diagnostic tests and  
8 examinations and most surgical and therapeutic procedures.  
9

### 10 11 12 13 14 15 16 17 18 19 *NSW administrative data*

20  
21 The NSW Emergency Department Data Collection (EDDC) collects data on presentations to  
22 emergency departments of public hospitals in NSW. The NSW Admitted Patient Data  
23 Collection (APDC) records all inpatient separations (discharges, transfers and deaths) from all  
24 public, private, psychiatric and repatriation hospitals in NSW, as well as public multi-purpose  
25 services, private day procedure centres and public nursing homes. The NSW Mental Health  
26 Ambulatory Data Collection (MH-AMB) includes information in relation to mental health day  
27 programs, psychiatric outpatients and outreach services (e.g. home visits). It also includes  
28 information regarding care provided by hospital based consultation liaison services to admitted  
29 patients in non-psychiatric and hospital emergency settings; care provided by community  
30 workers and clients in staffed community residential settings, mental health promotion and  
31 prevention services.  
32  
33  
34  
35  
36  
37  
38  
39  
40  
41  
42  
43  
44  
45  
46  
47  
48

### 49 **Patient and Public Involvement Statement**

50  
51  
52  
53  
54 There were no funds or time allocated for patient and public involvement, so we were unable  
55 to involve the public in the design of the study. However, we will develop a representative  
56  
57  
58  
59  
60

1  
2  
3 public committee to help us develop our dissemination strategy to mental health advocacy  
4  
5 groups and the community.  
6  
7  
8  
9  
10  
11  
12  
13  
14  
15  
16  
17  
18  
19  
20  
21  
22  
23  
24  
25  
26  
27  
28  
29  
30  
31  
32  
33  
34  
35  
36  
37  
38  
39  
40  
41  
42  
43  
44  
45  
46  
47  
48  
49  
50  
51  
52  
53  
54  
55  
56  
57  
58  
59  
60

For peer review only

**Table 2: Data sources to be linked in ASHLi**

| <b>Data Set</b>                | <b>Data Description</b>                                                                                                                                                                                                                                                | <b>Data Provider</b>                                   | <b>Geographical Coverage</b> | <b>Coverage in years</b>                  |
|--------------------------------|------------------------------------------------------------------------------------------------------------------------------------------------------------------------------------------------------------------------------------------------------------------------|--------------------------------------------------------|------------------------------|-------------------------------------------|
| Coronial Cases and Information | National repository containing data on deaths reported to a coroner in Australia and New Zealand.                                                                                                                                                                      | National Coronial Information System (NCIS)            | Australia-wide               | 1 July 2013–10 October 2019               |
| Medicines dispensing claims    | Australia's Pharmaceutical Benefits Scheme (PBS) is a national drug subsidy program for approved prescription medication and captures dispensing of all PBS-approved medicines in Australia.<br>Data will be extracted for each individual during the exposure period. | Australian Institute of Health and Welfare (AIHW)      | Australia-wide               | 1 July 2012–latest available before death |
| Health service records         | Medicare Benefits Scheme (MBS) is a listing of the Medicare services subsidised by the Australian government including any health care contacts, and any items used that are listed under the Mental Health Plan.                                                      | AIHW                                                   | Australia-wide               | 1 July 2012–latest available before death |
| Death records                  | The National Death Index (NDI) is a database developed and maintained by the Australian Institute of Health and Welfare in Canberra. The database is a listing of all deaths that have occurred in Australia since 1980.                                               | AIHW                                                   | Australia-wide               | 1 July 2013–latest available              |
| Admitted Patient Data          | Database that contains records of all inpatient separations (discharges, transfers and deaths) from all public, private, psychiatric and repatriation hospitals in NSW.                                                                                                | NSW Health Admitted Patient Data Collection (APDC)     | NSW                          | 1 July 2012–latest available              |
| Ambulatory Mental Health Data  | The MH-AMB collection is dedicated to the assessment, treatment, rehabilitation or care of non-admitted patients. It may include mental health day programs, psychiatric outpatients and outreach services (e.g., home visits). The                                    | NSW Health Data Ambulatory Mental Health Data (MH-AMB) | NSW                          | 1 July 2012–latest available              |



1  
2  
3  
4  
5  
6  
7  
8  
9  
10  
11  
12  
13  
14  
15  
16  
17  
18  
19  
20  
21  
22  
23  
24  
25  
26  
27  
28  
29  
30  
31  
32  
33  
34  
35  
36  
37  
38  
39  
40  
41  
42  
43  
44  
45  
46

|                                      |                                                                                                                                                                                                                                                                                           |                                                             |     |                              |
|--------------------------------------|-------------------------------------------------------------------------------------------------------------------------------------------------------------------------------------------------------------------------------------------------------------------------------------------|-------------------------------------------------------------|-----|------------------------------|
|                                      | data records 'contacts' (as opposed to 'episodes of care') by clinicians to a patient.                                                                                                                                                                                                    |                                                             |     |                              |
| Emergency Department Data Collection | The EDDC provides information about patient presentations to the emergency departments of public hospitals in New South Wales. By 2016 the EDDC captured 100% of public hospitals in NSW, prior to this time the number of contributing hospitals steadily increased from 90/150 in 2010. | NSW Health Data Emergency Department Data Collection (EDDC) | NSW | 1 July 2012–latest available |

For peer review only

## Measurements

### *Data from coroner reports*

The information from the NCIS that will be extracted for each suicide is listed in Table 3. Data extraction from the toxicology, police and autopsy reports will be completed by research assistants and students. Study investigators (KC, RC and JS) will provide training in the data extraction processes and will be available to address any questions and reach consensus regarding coding for more complex cases.

Table 3: Information collected from the NCIS for each included suicide case

| Variable(s)                                | Description                                                                                                                                                                                                                                                                |
|--------------------------------------------|----------------------------------------------------------------------------------------------------------------------------------------------------------------------------------------------------------------------------------------------------------------------------|
| <b>De-identified demographic variables</b> | Date of death, age at time of death, sex, marital status, employment status, country of birth, years in country                                                                                                                                                            |
| <b>ICD-10 Cause of Death</b>               | As determined during the Australian Bureau of Statistics mortality coding process                                                                                                                                                                                          |
| <b>Medical Cause of Death</b>              | As determined by the coroner                                                                                                                                                                                                                                               |
| <b>Incident date and time</b>              | When the incident that caused death occurred                                                                                                                                                                                                                               |
| <b>Mechanism and Object of Injury</b>      | Mechanism by which death occurred/objects involved in death                                                                                                                                                                                                                |
| <b>Geocoding result</b>                    | Statistical Area 3 (SA3) and 4 (SA4) of residential address at time of death. Statistical areas are provided by the Australian Statistical Geography Standard for use by the Australian Bureau of statistics (ABS) and others to analyse spatially integrated information. |

1  
2  
3  
4  
5  
6  
7  
8  
9  
10  
11  
12  
13  
14  
15  
16  
17  
18  
19  
20  
21  
22  
23  
24  
25  
26  
27  
28  
29  
30  
31  
32  
33  
34  
35  
36  
37  
38  
39  
40  
41  
42  
43  
44  
45  
46  
47  
48  
49  
50  
51  
52  
53  
54  
55  
56  
57  
58  
59  
60

|                          |                                                                                                                                                                                                         |
|--------------------------|---------------------------------------------------------------------------------------------------------------------------------------------------------------------------------------------------------|
| <b>Toxicology report</b> | We will document all drugs listed in each report, including their concentrations, the sample sites analysed, level of decomposition of the body and any other limitations to the toxicological testing. |
|--------------------------|---------------------------------------------------------------------------------------------------------------------------------------------------------------------------------------------------------|

#### *Data from PBS and MBS*

The data from the PBS that will be linked to each case includes date the medicine was prescribed and date the medicine was dispensed, medicine name, form, strength, number of prescriptions dispensed, and speciality of the prescriber. The data from the MBS that will be linked to each case includes date and type of health service accessed.

#### *Data from the APDC, EDDC and MH-AMB*

Data from the APDC and EDDC that will be linked to each case includes dates of episodes of care, diagnosis codes associated with episode of care, and mode of arrival and separation. Additionally, the triage category assigned to ED visits will be linked. Data from the MH-AMB that will be linked to each case includes dates associated with each contact, mental health diagnoses associated with contact and type of service.

#### ***Data linkage***

The data linkage in this study will adhere to the separation principle for data linkage. Identifying information is supplied to the data linkage staff by the NCIS data custodians. Once the relevant linkage processes have been performed, de-identified data will then be available to researchers for analyses.

The separation principle will be maintained throughout the data linkage process as follows:

1. The researchers will not have access to identifying information once they have received the linked data
2. Only approved research personnel will have access to the linked data and perform data analysis

### ***Planned data analysis***

*Aim 1:* To describe health service utilisation rates (both general and mental health) in the year prior to death by suicide, and how this varies by individual case characteristics

Using descriptive statistics, we will comprehensively describe and characterise the healthcare utilisation in the NSW cases within our sample in the year preceding suicide death by using the NSW Health data supplied by NSW Health and the MBS data supplied by AIHW. Categorical data will be described using frequencies and percentages.

Generalised linear models will be used to determine predictors of healthcare contacts before death. The dependent healthcare utilisation variables we will investigate include ambulatory mental health contact, acute mental health contact and no mental health contact. Independent variables and covariates examined will include: age, sex, SES, and class of medication prescribed. Odds ratios with 95% CIs will be reported for each predictor.

Spatial maps of age and sex standardised suicide rate according to the presence or absence of healthcare within a month of death will be generated for Australia using SA3 regions of residence at time of death.

*Aim 2:* To describe prescribed medicines use in the year prior to death by suicide, medicines used in suicide by poisoning and how this varies by individual case characteristics.

Using descriptive statistics, we will comprehensively describe and characterise the dispensed prescription medication use in our sample in the year preceding suicide death using the PBS data supplied by AIHW. Categorical data will be described using frequencies and percentages.

1  
2  
3 For the prescription medicines that are not used to treat mental illness, such as antibiotics, ACE  
4 inhibitors, gabapentinoids or isotretinoin, we will conduct disproportionality analysis (18) to determine  
5 whether the rate of use in suicide cases is above that reported in the Australian population using other  
6 available sources of national representative PBS dispensing data.  
7  
8  
9  
10  
11

12  
13 Generalised linear models will be used to determine predictors of prescribed medication use  
14 patterns including: cases not dispensed a psychotropic medication, cases non-compliant with  
15 psychotropic medication at time of death, initiation of a psychotropic medication within 1  
16 month of death and discontinuation of a psychotropic medication within 1 month of death.  
17  
18  
19  
20  
21  
22  
23  
24

25  
26  
27 Independent variables and covariates examined will include: age, sex, SES, method of death and class  
28 of medication prescribed. Odds ratios with 95% CIs will be reported for each predictor.  
29  
30  
31

32  
33 Spatial maps of suicide according to the presence or absence of medicine within a month of death will  
34 be generated for Australia using SA3 regions of residence at time of death.  
35  
36  
37  
38

### 39 **ETHICS AND DISSEMINATION**

40  
41 This project involves use of sensitive and confidential data. Data will be linked using a third-party  
42 privacy preserving protocol meaning that investigators will not have access to identifiable information  
43 once the data has been linked. Statistical analyses will be carried out in a secure environment. ASHLi  
44 has been approved by the following data custodians and ethics committees: 1) the National Coronial  
45 Information System (NCIS) (REF: M0400), 2) the Justice Department Human Research Ethics  
46 Committee (REF: CF/17/23250), 3) the Western Australian Coroners Court (REF: EC 14/18 M0400);  
47  
48  
49  
50  
51  
52  
53  
54  
55  
56  
57  
58  
59  
60

1  
2  
3 Findings will be published in peer-reviewed journals, presented at conferences and communicated to  
4 regulatory authorities, clinicians, mental health advocacy groups and policy makers.  
5  
6  
7  
8  
9

## 10 **DISCUSSION**

11  
12 Australia is one of the few countries in the world with an investment in data linkage infrastructure to  
13 allow a project of this scope to be achieved. This study will significantly advance knowledge of health  
14 service and medicine utilisation prior to suicide in Australia. The project outcomes will have a  
15 significant impact on suicide prevention initiatives by identifying gaps in our national suicide  
16 prevention strategy, and subsequently providing information on ways to optimise future approaches.  
17  
18  
19

20 ASHLi will result in the following central outcomes:  
21  
22  
23  
24

25  
26  
27  
28 1. *Identifying the reach of suicide prevention initiatives delivered via health services.*

29  
30 By identifying population characteristics associated with different types of health service use, this  
31 analysis will provide important information for targeting suicide initiatives. For example, if one type  
32 of service is used more commonly in younger females then reinforcing tailored programs toward this  
33 group within that service may increase efficacy of suicide prevention compared to broadly focussed  
34 interventions. Furthermore, locating where high/low service use occurs and determining when, in  
35 relation to suicide, particular services are most commonly accessed, the analysis will provide specific  
36 information about where and when to reinforce or redirect our current strategies.  
37  
38  
39  
40  
41  
42  
43  
44  
45  
46

47 2. *Highlighting barriers to health service utilisation.*

48  
49 By interpreting health service use in concert with health service location we will shed light on whether  
50 barriers to health service utilisation may be due to intrinsic factors (unwillingness by the individual to  
51 seek help) vs. extrinsic factors (remoteness/lack of services). The former will highlight groups of  
52 people for whom non-clinical forms of intervention may be the most efficacious and where they should  
53 be targeted (i.e. online therapy, restricting means of suicide, public health campaigns).  
54  
55  
56  
57  
58  
59  
60

1  
2  
3       3. *Providing information to help target means restriction.*  
4

5 Means restriction is the primary mode of suicide prevention applicable to those who do not access  
6 health services. Our analysis of the methods of suicide that are most commonly used in these people  
7 will provide information on priority suicide methods to target, in what populations, and where.  
8  
9

10  
11  
12  
13       4. *Highlighting potentially harmful medicine use.*  
14

15 Information on medicines used in overdose will have important implications for regulatory authorities  
16 and prescribers, especially when psychotropic medicine use occurs in the absence of mental health  
17 service utilisation, which is against best practice recommendations. We will also provide further  
18 evidence regarding concerns about pro-suicidal effects of several non-psychotropic medicines.  
19  
20  
21  
22  
23

24  
25       5. *Foundational research for future studies*  
26

27 The rich data source created in order to achieve the aims of the current proposal will be used for many  
28 further analyses by the study team. For example, with the addition of appropriate data from the general  
29 population, we can zoom in on particular medicine classes of interest and conduct disproportionality  
30 analysis to assess how use of medicines by our sample differs compared to the general population.  
31  
32  
33  
34  
35

36  
37 *Limitations*  
38

39  
40 There are a number of limitations associated with the nature of the data used in this study. Firstly,  
41 there will be an underascertainment of health service use for the cases in our study. MBS data does  
42 not include enough detail on mental health services provided in hospital to allow the identification of  
43 hospitalised self-harm and other emergency psychiatric presentations. Health service data collected  
44 by State governments includes detailed data on hospitalisations and non-hospital mental health  
45 services, therefore is not constrained by the same limitations. Therefore we will supplement the MBS  
46 mental health data using NSW state data collections. Initially, we have chosen to use this approach in  
47 NSW given its large population (around one third of Australians). By comparing the estimates we  
48  
49  
50  
51  
52  
53  
54  
55  
56  
57  
58  
59  
60

1  
2  
3 receive from MBS alone to MBS plus NSW state collections we will be able to estimate the degree  
4  
5 of underascertainment in other states in Australia and report on this accordingly.  
6  
7

8 Medicine use will also be limited by under-ascertainment. It is possible to obtain scripts outside the  
9  
10 PBS, such as private prescriptions, medicines dispensed within public hospitals to inpatients, or  
11  
12 opioid maintenance treatments (methadone and buprenorphine) will not be captured. The study will  
13  
14 also not capture medicines sold over-the-counter, complementary or alternative medicines.  
15  
16

17  
18 Another limitation is that all cases in the study have died from suicide, therefore risk of suicide  
19  
20 associated with any healthcare or medicine use patterns can not be established. This study will instead  
21  
22 highlight these patterns, so that further studies with appropriate control groups can be established.  
23  
24

25  
26 **Contributors:** The Principal Investigator (KMC) and NAB were responsible for the conceptualisation  
27  
28 of ASHLi. KMC, JLS, RC, AS, NAB, AP, GC, JER, SAP were responsible for the protocol design.  
29  
30 The manuscript was drafted by KMC and NJG. All authors contributed to the final version.  
31  
32

33  
34  
35  
36 **Funding:** This study is funded by a grant from the National Health and Medical Research Centre  
37  
38 (NHMRC, REF: APP1157757) and the Translational Australian Clinical Toxicology Research Group  
39  
40 (TACT). An NHMRC Early Career Fellowship funds KMC (Grant number: 1122362). The funding  
41  
42 organizations played no part in the design of the study; nor in the preparation, review, or approval of  
43  
44 the manuscript.  
45  
46

47  
48  
49  
50 **Competing interests:** None  
51  
52

53  
54  
55 **Data Sharing Statement:** Only approved personnel may access the data. Researchers interested in  
56  
57 collaborations or further information are invited to contact KMC at [kate.chitty@sydney.edu.au](mailto:kate.chitty@sydney.edu.au).  
58  
59  
60



1  
2  
3  
4  
5  
6  
7  
8  
9  
10  
11  
12  
13  
14  
15  
16  
17  
18  
19  
20  
21  
22  
23  
24  
25  
26  
27  
28  
29  
30  
31  
32  
33  
34  
35  
36  
37  
38  
39  
40  
41  
42  
43  
44  
45  
46  
47  
48  
49  
50  
51  
52  
53  
54  
55  
56  
57  
58  
59  
60

**Acknowledgements:** We would like to thank the National Coronial Information System (NCIS) which is managed by the Victorian Department of Justice and Community Safety, Centre for Health Record Linkage (CHeReL) and the NSW Ministry of Health

For peer review only

## References

1. WHO: Preventing suicide: A global imperative. Geneva; 2014.
2. Australian Bureau of Statistics. 3303.0 - Causes of Death, Australia, 2018. 2019.
3. Kryszynska K, Batterham PJ, Tye M, Shand F, Calear AL, Cockayne N, et al. Best strategies for reducing the suicide rate in Australia. *The Australian and New Zealand journal of psychiatry*. 2016;50(2):115-8.
4. Zalsman G, Hawton K, Wasserman D, van Heeringen K, Arensman E, Sarchiapone M, et al. Suicide prevention strategies revisited: 10-year systematic review. *The Lancet Psychiatry*. 2016;3(7):646-59.
5. Sinyor M, Howlett A, Cheung AH, Schaffer A. Substances used in completed suicide by overdose in Toronto: an observational study of coroner's data. *Canadian journal of psychiatry Revue canadienne de psychiatrie*. 2012;57(3):184-91.
6. Stene-Larsen K, Reneflot A. Contact with primary and mental health care prior to suicide: A systematic review of the literature from 2000 to 2017. *Scandinavian journal of public health*. 2017;1403494817746274.
7. Ahmedani BK, Stewart C, Simon GE, Lynch F, Lu CY, Waitzfelder BE, et al. Racial/Ethnic differences in health care visits made before suicide attempt across the United States. *Med Care*. 2015;53(5):430-5.
8. Svetlicic J, Milner A, De Leo D. Contacts with mental health services before suicide: a comparison of Indigenous with non-Indigenous Australians. *General hospital psychiatry*. 2012;34(2):185-91.
9. O'Neill S, Graham B, Ennis E. Prescribed pain and mental health medication prior to suicide: A population based case control study. *Journal of affective disorders*. 2019;246:195-200.
10. Ilgen MA, Kleinberg F, Ignacio RV, Bohnert AS, Valenstein M, McCarthy JF, et al. Noncancer pain conditions and risk of suicide. *JAMA psychiatry*. 2013;70(7):692-7.
11. Ferrari AJ, Norman RE, Freedman G, Baxter AJ, Pirkis JE, Harris MG, et al. The burden attributable to mental and substance use disorders as risk factors for suicide: findings from the Global Burden of Disease Study 2010. *PloS one*. 2014;9(4):e91936.
12. Hawton K, Bergen H, Simkin S, Cooper J, Waters K, Gunnell D, et al. Toxicity of antidepressants: rates of suicide relative to prescribing and non-fatal overdose. *The British journal of psychiatry : the journal of mental science*. 2010;196(5):354-8.
13. AIHW: Medicare-subsidised GP, allied health and specialist health care across local areas: 2013–14 to 2017–18. 2019.
14. AIHW 2016. Australia's health 2016. Australia's health no. 15. Cat. no. AUS 199. Canberra: AIHW.
15. AIHW. Mental Health Services in brief 2019. 2019.
16. Mellish L, Karanges EA, Litchfield MJ, Schaffer AL, Blanch B, Daniels BJ, et al. The Australian Pharmaceutical Benefits Scheme data collection: a practical guide for researchers. *BMC Research Notes*. 2015;8(1):634.
17. Australian Government Department of Health. Australian statistics on medicine 2011. . Canberra: Australian Government Department of Health; 2013.
18. Caster O, Aoki Y, Gattepaille LM, Grundmark B. Disproportionality Analysis for Pharmacovigilance Signal Detection in Small Databases or Subsets: Recommendations for Limiting False-Positive Associations. *Drug safety*. 2020.
