# Supplementary material for: Australian Suicide Prevention using Health-Linked Data (ASHLi): Protocol for a population-based case series study
Source: PubMed Central journal article supplement — BMJ Open. 2020 May 11;10(5):e038181. doi: 10.1136/bmjopen-2020-038181 (PMC7223353; doi:10.1136/bmjopen-2020-038181), 2020-05-11
Supplement: bmjopen-2020-038181.reviewer_comments.pdf [file bmjopen-2020-038181.reviewer_comments.pdf]

## PEER REVIEW HISTORY

BMJ Open publishes all reviews undertaken for accepted manuscripts. Reviewers are asked to complete a checklist review form (<http://bmjopen.bmj.com/site/about/resources/checklist.pdf>) and are provided with free text boxes to elaborate on their assessment. These free text comments are reproduced below.

## ARTICLE DETAILS

|                            |                                                                                                                                                                                       |
|----------------------------|---------------------------------------------------------------------------------------------------------------------------------------------------------------------------------------|
| <b>TITLE (PROVISIONAL)</b> | Australian Suicide Prevention using Health-Linked Data (ASHLi): A population-based case series study                                                                                  |
| <b>AUTHORS</b>             | Chitty, Kate; Schumann, Jennifer; Schaffer, Andrea; Cairns, Rose; Gonzaga, Nicole Jade; Raubenheimer, Jacques; Carter, Gregory; Page, Andrew; Pearson, Sallie-Anne; Buckley, Nicholas |

This article was not externally reviewed at BMJ Open. Protocols that have been independently assessed prior to submission to BMJ Open are usually fast-tracked to publication on the grounds that further substantial changes will not be possible. This independent assessment will usually be external, independent review for both a substantial grant award from a non-commercial or government funder and ethics approval.
